# Supplementary material
Source: Research Square preprint supplement (doi:10.21203/rs.3.rs-9616662/v1)
Supplement: Supplementary file 1 [file f1bdc07b600cd0c5ed0bda6c.docx]

Table S1. Baseline morphofunctional echocardiographic parameters in the AH+ and AH– groups.

| **ECHO Parameter** | **AH+ group (Baseline)**  **n = 33**  **Me (Q1; Q3)** | **AH– group (Baseline)**  **n = 67 Me**  **(Q1; Q3)** | **p-value** |
| --- | --- | --- | --- |
| GLS, % | 20.3  (17.9; 21.2) | 20.4  (18.7; 21.8) | 0.507 |
| LVEF, % | 68  (65; 70) | 68  (64; 72) | 0.589 |
| E/A ratio | 1.20  (1.10; 1.32) | 1.36  (1.23; 1.48) | < 0.001 |
| E/e’ ratio | 7.9  (6.6; 8.6) | 7.1  (6.1; 7.8) | 0.007 |
| e’, cm/s | 11.1  (9.0; 12.7) | 12.0  (9.7; 13.9) | 0.129 |
| LAVI, ml/m² | 28  (25; 32) | 25  (22; 29) | 0.006 |
| EDVI, ml/m² | 63  (59; 72) | 58  (53; 64) | 0.005 |
| ESVI, ml/m² | 22  (19; 24) | 19  (17; 22) | 0.031 |
| RWT | 0.45  (0.43; 0.48) | 0.44  (0.40; 0.45) | 0.076 |
| SV, ml | 77  (64; 90) | 69  (61; 77) | 0.006 |
| LVM, g | 161  (142; 175) | 138  (125; 156) | < 0.001 |
| LVMI, g/m² | 90  (79; 95) | 76  (70; 82) | < 0.001 |

**Table S2.** Echocardiographic parameters in the study groups after the completion of doxorubicin chemotherapy.

| **ECHO Parameter** | **AH+ group**  **n = 33**  **Me (Q1; Q3)** | **AH– group**  **n = 67 Me**  **(Q1; Q3)** | **p-value** |
| --- | --- | --- | --- |
| GLS, % | 19,9  (16,9; 21,5) | 19,2  (17,8; 21,6) | 0,792 |
| LVEF, % | 65  (62; 71) | 66  (62; 70) | 0,761 |
| E/A ratio | 1,21  (1,08; 1,32) | 1,32  (1,16; 1,55) | 0,005 |
| E/e’ ratio | 8,8  (7,4; 10,5) | 7,2  (6,2; 8,1) | < 0,001 |
| e’, cm/s | 9,0  (6,8; 10,7) | 11,1  (8,6; 13,1) | < 0,001 |
| LAVI, ml/m² | 26  (24; 32) | 27  (23; 30) | 0,835 |
| EDVI, ml/m² | 59  (52; 71) | 60  (51; 67) | 0,610 |
| ESVI, ml/m² | 22  (18; 24) | 20  (17; 24) | 0,863 |
| RWT | 0,45  (0,43; 0,49) | 0,43  (0,39; 0,47) | 0,006 |
| SV, ml | 72  (65; 89) | 68  (60; 79) | 0,178 |
| LVM, g | 158  (141; 183) | 143  (124; 163) | 0,023 |
| LVMI, g/m² | 86  (75; 99) | 78  (51; 89) | 0,018 |

**Table S3.** Dynamics of echocardiographic parameters in the AH+ CTRCD+ subgroup.

| **ECHO Parameter** | **Before CTx**  **(baseline)**  **n = 6**  **Me**  **(Q1; Q3)** | **After CTx**  **n = 6**  **Me**  **(Q1; Q3)** | **p-value** |
| --- | --- | --- | --- |
| GLS, % | 19,9  (16,9; 20,9) | 15,6  (11,2; 17,9) | 0,027 |
| LVEF, % | 72  (68; 73) | 68  (61; 70) | 0,043 |
| E/A ratio | 1,10  (1,10; 1,20) | 1,09  (0,83; 1,32) | 1,000 |
| E/e’ ratio | 7,5  (6,6; 9,5) | 7,7  (6,6; 11,2) | 0,753 |
| e’, cm/s | 8,9  (6,5; 10,3) | 7,1  (5,9; 11,3) | 0,600 |
| LAVI, ml/m² | 32  (26; 34) | 27  (22; 33) | 0,043 |
| EDVI, ml/m² | 70  (56; 73) | 66  (51; 74) | 0,917 |
| ESVI, ml/m² | 21  (17; 26) | 24  (16; 24) | 0,893 |
| RWT | 0,44  (0,42; 0,45) | 0,43  (0,40; 0,46) | 0,893 |
| SV, ml | 86  (68; 110) | 85  (61; 97) | 0,462 |
| LVM, g | 173  (151; 201) | 172  (151; 185) | 0,144 |
| LVMI, g/m² | 91  (84; 103) | 89  (81; 95) | 0,138 |

Table S4. Dynamics of echocardiographic parameters in the AH+ CTRCD– subgroup (diastolic injury scenario).

| **ECHO Parameter** | **Before CTx**  **(baseline)**  **n = 27**  **Me**  **(Q1; Q3)** | **After CTx**  **n = 27**  **Me**  **(Q1; Q3)** | **p-value** |
| --- | --- | --- | --- |
| GLS, % | 20,3  (17,9; 22,2) | 20,4  (19,0; 21,7) | 0,576 |
| LVEF, % | 68  (62; 70) | 64  (62; 72) | 0,584 |
| E/A ratio | 1,24  (1,10; 1,33) | 1,24  (1,10; 1,39) | 0,747 |
| E/e’ ratio | 7,9  (6,6; 8,9) | 8,9  (7,4; 10,5) | 0,009 |
| e’, cm/s | 11,8  (10,1; 12,8) | 9,1  (5,9; 11,3) | < 0,001 |
| LAVI, ml/m² | 28  (26; 31) | 26  (24; 30) | 0,186 |
| EDVI, ml/m² | 63  (57; 75) | 59  (51; 69) | 0,032 |
| ESVI, ml/m² | 22  (19; 24) | 20  (17; 24) | 0,536 |
| RWT | 0,45  (0,43; 0,49) | 0,46  (0,43; 0,50) | 0,625 |
| SV, ml | 76  (64; 90) | 70  (65; 85) | 0,121 |
| LVM, g | 161  (142; 172) | 156  (141; 196) | 0,790 |
| LVMI, g/m² | 89  (78; 95) | 84  (74; 100) | 0,978 |

Table S5. Dynamics of echocardiographic parameters in the AH– CTRCD+ subgroup (systolic injury scenario).

| **ECHO Parameter** | **Before CTx**  **(baseline)**  **n = 13**  **Me**  **(Q1; Q3)** | **After CTx**  **n = 13**  **Me**  **(Q1; Q3)** | **p-value** |
| --- | --- | --- | --- |
| GLS, % | 20,5  (18,1; 21,1) | 15,9  (14,9; 17,1) | 0,001 |
| LVEF, % | 65  (60; 72) | 65  (63; 72) | 0,387 |
| E/A ratio | 1,28  (1,20; 1,39) | 1,33  (1,16; 1,54) | 0,576 |
| E/e’ ratio | 7,1  (6,5; 8,4) | 7,3  (6,5; 8,5) | 0,807 |
| e’, cm/s | 10,7  (7,3; 15,1) | 9,6  (7,2; 12,5) | 0,133 |
| LAVI, ml/m² | 22  (22; 28) | 27  (23; 29) | 0,133 |
| EDVI, ml/m² | 51  (47; 60) | 60  (44; 68) | 0,388 |
| ESVI, ml/m² | 17  (15; 21) | 19  (15; 24) | 0,480 |
| RWT | 0,44  (0,41; 0,51) | 0,45  (0,38; 0,50) | 0,135 |
| SV, ml | 61  (53; 71) | 75  (51; 78) | 0,278 |
| LVM, g | 138  (120; 152) | 140  (126; 154) | 0,807 |
| LVMI, g/m² | 76  (69; 88) | 77  (72; 86) | 0,906 |

Table S6. Dynamics of echocardiographic parameters in the AH– CTRCD– subgroup.

| **ECHO Parameter** | **Before CTx**  **(baseline)**  **n = 54**  **Me**  **(Q1; Q3)** | **After CTx**  **n = 54**  **Me**  **(Q1; Q3)** | **p-value** |
| --- | --- | --- | --- |
| GLS, % | 20,3  (18,7; 22,0) | 20,3  (18,8; 22,0) | 0,095 |
| LVEF, % | 69  (65; 72) | 66  (61; 70) | 0,001 |
| E/A ratio | 1,36  (1,23; 1,50) | 1,30  (1,16; 1,56) | 0,209 |
| E/e’ ratio | 6,9  (6,0; 7,7) | 7,1  (6,0; 8,1) | 0,378 |
| e’, cm/s | 11,9  (9,9; 13,8) | 11,3  (8,9; 13,4) | 0,411 |
| LAVI, ml/m² | 26  (22; 29) | 27  (23; 31) | 0,093 |
| EDVI, ml/m² | 59  (54; 66) | 59  (52; 67) | 0,255 |
| ESVI, ml/m² | 19  (17; 23) | 21  (17; 24) | 0,105 |
| RWT | 0,44  (0,40; 0,45) | 0,42  (0,39; 0,46) | 0,352 |
| SV, ml | 74  (61; 78) | 68  (60; 84) | 0,791 |
| LVM, g | 139  (123; 156) | 144  (123; 167) | 0,056 |
| LVMI, g/m² | 77  (70; 82) | 79  (69; 89) | 0,051 |

Table S7. Dynamics of cardiac-specific biomarkers in the overall patient cohort.

| Biomarker | Overall group  n = 100  Me  (Q1; Q3) | | р-value | CTRCD+  n = 19  Me  (Q1; Q3) | | р-value | CTRCD-  n = 81  Me  (Q1; Q3) | | р-value |
| --- | --- | --- | --- | --- | --- | --- | --- | --- | --- |
| Baseline | Post-CTx | Baseline | Post-CTx | Baseline | Post-CTx |
| hs-cTnI,  pg/ml | 1,7  (1,6;3,6) | 2,1  (1,8;3,7) | 0,006 | 1,6  (1,4;2,1) | 2,2  (2,0;3,0) | 0,191 | 1,7  (1,6;3,7) | 1,8  (1,7;4,3) | 0,018 |
| hs-cTnT,  pg/ml | 3,3  (2,8;4,0) | 3,7  (3,1;4,8) | 0,003 | 2,9  (2,7;3,8) | 4,3  (3,4;7,8) | 0,455 | 3,5  (2,9;4,0) | 3,7  (3,1;4,7) | 0,003 |
| NT-proBNP,  pg/ml | 5,7  (4,1;14,2) | 8,8  (5,1;42) | 0,040 | 5,3  (4,0;7,2) | 9,0  (4,9;13,1) | 0,052 | 5,7  (4,2;22,0) | 5,7  (5,2;45,5) | 0,183 |

Table S8. Changes in troponin and natriuretic peptide levels in the AH+ group.

| Biomarker | AH+ group  n = 33  Me  (Q1; Q3) | | р-value | AH+CTRCD+  n = 6  Me  (Q1; Q3) | | р-value | AH+CTRCD-  n = 27  Me  (Q1; Q3) | | р-value |
| --- | --- | --- | --- | --- | --- | --- | --- | --- | --- |
| Baseline | Post-CTx | Baseline | Post-CTx | Baseline | Post-CTx |
| hs-cTnI,  pg/ml | 1,7  (1,5;1,9) | 2,2  (1,7;3,7) | 0,019 | 1,5  (1,4;2,2) | 2,2  (2,2;3,4) | 0,463 | 1,7  (1,6;1,9) | 2,1  (1,6;3,6) | 0,023 |
| hs-cTnT,  pg/ml | 3,3  (2,9;3,5) | 4,0  (3,2;5,8) | 0,006 | 2,9  (2,6;3,0) | 4,4  (4,3;6,8) | 0,345 | 3,3  (3,0;3,6) | 3,8  (3,2;5,4) | 0,011 |
| NT-proBNP,  pg/ml | 5,4  (4,3;9,4) | 8,9  (4,9;42,3) | 0,381 | 5,1  (4,4;6,2) | 10,3  (5,3;12,0) | 0,753 | 5,7  (4,4;9,5) | 7,5  (5,2;42,3) | 0,407 |

Table S9. Changes in troponin and natriuretic peptide levels in the AH– group.

| Biomarker | AH- group  n = 67  Me  (Q1; Q3) | | р-value | AH-CTRCD-  n = 13  Me  (Q1; Q3) | | р-value | AH-CTRCD-  n = 54  Me  (Q1; Q3) | | р-value |
| --- | --- | --- | --- | --- | --- | --- | --- | --- | --- |
| Baseline | Post-CTx | Baseline | Post-CTx | Baseline | Post-CTx |
| hs-cTnI,  pg/ml | 1,8  (1,6;5,1) | 2,1  (1,8;4,3) | 0,084 | 1,7  (1,5;2,1) | 2,2  (1,8;2,8) | 0,279 | 1,9  (1,7;5,4) | 2,0  (1,8;5,4) | 0,174 |
| hs-cTnT,  pg/ml | 3,4  (2,9;4,3) | 3,7  (3,1;4,7) | 0,091 | 3,0  (2,8;4,1) | 4,1  (3,4;8,8) | 0,861 | 3,5  (3,0;4,4) | 3,7  (3,1;4,4) | 0,059 |
| NT-proBNP,  pg/ml | 5,8  (4,0;21,2) | 8,8  (5,2;46,9) | 0,040 | 5,3  (3,8;7,0) | 9,1  (5,0;14,1) | 0,028 | 5,8  (4,0;24,7) | 8,4  (5,3;48,8) | 0,230 |

Table S10. Genotype frequency distribution and Hardy-Weinberg equilibrium (HWE) compliance in the AH+ group.

| **Locus (SNP)** | **Genotypes (n)** | **Chi-square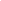** | **p-value (HWE)** | **Status** |
| --- | --- | --- | --- | --- |
| CBR3 rs1056892 | 4 / 11 / 18 | 0.111 | 0.739 | Compliant |
| GSTP1 rs1695 | 12 / 11 / 2 | 0.042 | 0.838 | Compliant |
| ABCC2 rs8187710 | 1 / 3 / 20 | 2.752 | 0.097 | Compliant |
| SOD2 rs4880 | 4 / 13 / 8 | 0.422 | 0.516 | Compliant |
| HAS3 rs2232228 | 7 / 6 / 11 | 2.746 | 0.098 | Compliant |
| CELF4 rs1786814 | 1 / 7 / 17 | 0.095 | 0.757 | Compliant |
| MMP9 rs17576 | 8 / 14 / 0 | 5.143 | 0.023 | Deviation* |
| MMP2 rs243865 | 14 / 7 / 4 | 3.195 | 0.074 | Compliant |
| MMP2 rs243866 | 1 / 12 / 12 | 1.180 | 0.277 | Compliant |
| MMP3 rs35068180 | 15 / 9 / 1 | 0.016 | 0.899 | Compliant |
| MMP3 rs522616 | 0 / 8 / 17 | 0.866 | 0.352 | Compliant |
| MMP3 rs679620 | 6 / 14 / 5 | 0.490 | 0.484 | Compliant |
| MMP9 rs3918242 | 19 / 6 / 0 | 0.466 | 0.495 | Compliant |
| SLC28A3 rs7853758 | 1 / 3 / 21 | 2.829 | 0.093 | Compliant |
| RARG rs2229774 | 0 / 4 / 21 | 0.188 | 0.665 | Compliant |

Table S11. Genotype frequency distribution and Hardy-Weinberg equilibrium (HWE) compliance in the AH– group.

| **Locus (SNP)** | **Genotypes (n)** | **Chi-square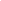** | **p-value (HWE)** | **Status** |
| --- | --- | --- | --- | --- |
| CBR3 rs1056892 | 16 / 23 / 22 | 2,126 | 0,145 | Compliant |
| GSTP1 rs1695 | 18 / 27 / 16 | 0,911 | 0,340 | Compliant |
| ABCC2 rs8187710 | 1 / 2 / 57 | 1,444 | 0,229 | Compliant |
| SOD2 rs4880 | 14 / 34 / 13 | 1,460 | 0,227 | Compliant |
| HAS3 rs2232228 | 29 / 16 / 14 | 9,933 | *0,001* | Deviation* |
| CELF4 rs1786814 | 0 / 12 / 49 | 0,724 | 0,395 | Compliant |
| MMP9 rs17576 | 21 / 31 / 0 | 10,21 | *0,001* | Deviation* |
| MMP2 rs243865 | 10 / 21 / 30 | 0,165 | 0,684 | Compliant |
| MMP2 rs243866 | 3 / 30 / 28 | 2,829 | 0,092 | Compliant |
| MMP3 rs35068180 | 25 / 26 / 10 | 1,027 | 0,311 | Compliant |
| MMP3 rs522616 | 44 / 16 / 1 | 0,154 | 0,695 | Compliant |
| MMP3 rs679620 | 5 / 38 / 18 | 9,510 | *0,002* | Deviation* |
| MMP9 rs3918242 | 43 / 18 / 0 | 1,854 | 0,173 | Compliant |
| SLC28A3 rs7853758 | 9 / 7 / 45 | 16,91 | *< 0,001* | Deviation* |
| RARG rs2229774 | 0 / 9 / 50 | 0,402 | 0,526 | Compliant |
